# Supplementary material
Source: HighWire-hosted journal article supplement (https://www.qdcxjkg.com/highwire/filestream/114319/field_highwire_adjunct_files/0/Bos_ERJ_GCMSforARDS_SupplementaryMaterial_R1_1.pdf)

Supplementary Material

**Exhaled breath metabolomics as non-invasive diagnostic tool for ARDS.**

*Lieuwe DJ Bos, MSc<sup>1,2</sup>, Hans Weda, PhD<sup>4</sup>, Yuanyue Wang<sup>4</sup>, Hugo H Knobel, Ir<sup>4</sup>, Tamara ME Nijssen, PhD<sup>4</sup>, Teunis J Vink, PhD<sup>4</sup>, Aeilko H. Zwinderman PhD<sup>3</sup>, Peter J Sterk, MD PhD<sup>2</sup>, Marcus J Schultz, MD PhD<sup>1</sup>*

**Academic Medical Center – University of Amsterdam, The Netherlands:**

<sup>1</sup> Intensive Care, <sup>2</sup> Department of Respiratory Medicine, <sup>3</sup> Clinical Epidemiology and Biostatistics

<sup>4</sup> Philips Research, Eindhoven, The Netherlands

**Supplement Materials and Methods**

**Supplement Tables**

**Supplement Figures**

## Supplement Tables

**Table E1: Adherence to STARD guidelines.**

| Section and Topic           | Item |                                                                                                                                                                                                                                                            | On page                          |
|-----------------------------|------|------------------------------------------------------------------------------------------------------------------------------------------------------------------------------------------------------------------------------------------------------------|----------------------------------|
| TITLE/ABSTRACT/<br>KEYWORDS | 1    | Identify the article as a study of diagnostic accuracy(recommend MeSH heading 'sensitivity and specificity').                                                                                                                                              | 2                                |
| INTRODUCTION                | 2    | State the research questions or study aims, such as estimating diagnostic accuracy or comparing accuracy between tests or across participant groups.                                                                                                       | 4                                |
| METHODS                     |      |                                                                                                                                                                                                                                                            |                                  |
| <i>Participants</i>         | 3    | Describe the study population: The inclusion and exclusion criteria, setting and locations where the data were collected.                                                                                                                                  | 5                                |
|                             | 4    | Describe participant recruitment: Was recruitment based on presenting symptoms, results from previous tests, or the fact that the participants had received the (evaluated) index tests or the (golden) reference standard?                                | 5                                |
|                             | 5    | Describe participant sampling: Was the study population a consecutive series of participants defined by the selection criteria in items 3 and 4? If not, specify how participants were further selected.                                                   | 5                                |
|                             | 6    | Describe data collection: Was data collection planned before the index test and reference standard were performed (prospective study) or after (retrospective study)?                                                                                      | 5–6                              |
| <i>Test methods</i>         | 7    | Describe the reference standard and its rationale.                                                                                                                                                                                                         | 4                                |
|                             | 8    | Describe technical specifications of material and methods involved including how and when measurements were taken, and/or cite references for index tests and reference standard.                                                                          | <i>Online supplement</i>         |
|                             | 9    | Describe definition of and rationale for the units, cut–offs and/or categories of the results of the index tests and the reference standard.                                                                                                               | N.A.                             |
|                             | 10   | Describe the number, training and expertise of the persons executing and reading the index tests and the reference standard.                                                                                                                               | 4 and <i>Online supplement</i>   |
|                             | 11   | Describe whether or not the readers of the index tests and reference standard were blind (masked) to the results of the other test and describe any other clinical information available to the readers.                                                   | <i>Online supplement</i>         |
| <i>Statistical methods</i>  | 12   | Describe methods for calculating or comparing measures of diagnostic accuracy, and the statistical methods used to quantify uncertainty ( <i>e.g.</i> 95% confidence intervals).                                                                           | 5–6 and <i>Online supplement</i> |
|                             | 13   | Describe methods for calculating test reproducibility, if done.                                                                                                                                                                                            | <i>Online supplement</i>         |
| RESULTS                     |      |                                                                                                                                                                                                                                                            |                                  |
| <i>Participants</i>         | 14   | Report when study was done, including beginning and ending dates of recruitment.                                                                                                                                                                           | 4                                |
|                             | 15   | Report clinical and demographic characteristics of the study population ( <i>e.g.</i> age, sex, spectrum of presenting symptoms, co morbidity, current treatments, recruitment centers).                                                                   | 6 & Table 1, E3 and E4           |
|                             | 16   | Report the number of participants satisfying the criteria for inclusion that did or did not undergo the index tests and/or the reference standard; describe why participants failed to receive either test (a flow diagram is strongly recommended).       | 6 & Figure 1                     |
| <i>Test results</i>         | 17   | Report time interval from the index tests to the reference standard, and any treatment administered between.                                                                                                                                               | <i>Online supplement</i>         |
|                             | 18   | Report distribution of severity of disease (define criteria) in those with the target condition; other diagnoses in participants without the target condition.                                                                                             | 6 & Table 1                      |
|                             | 19   | Report a cross tabulation of the results of the index tests (including indeterminate and missing results) by the results of the reference standard; for continuous results, the distribution of the test results by the results of the reference standard. | 6–8                              |
|                             | 20   | Report any adverse events from performing the index tests or the reference standard.                                                                                                                                                                       | N.A.                             |
| <i>Estimates</i>            | 21   | Report estimates of diagnostic accuracy and measures of statistical uncertainty ( <i>e.g.</i> 95% confidence intervals).                                                                                                                                   | 6–8                              |
|                             | 22   | Report how indeterminate results, missing responses and outliers of the index tests were handled.                                                                                                                                                          | N.A.                             |
|                             | 23   | Report estimates of variability of diagnostic accuracy between subgroups of participants, readers or centers, if done.                                                                                                                                     | 8                                |
|                             | 24   | Report estimates of test reproducibility, if done.                                                                                                                                                                                                         | 7                                |
| DISCUSSION                  | 25   | Discuss the clinical applicability of the study findings.                                                                                                                                                                                                  | 9–13                             |

**Table E2: Criteria for community– and hospital acquired pneumonia.**

| <b>Community acquired pneumonia</b>                                                                       |                                                           | <i>Symptoms of pneumonia started at home or in first 48h of hospital admission</i> |                                                                  |  |
|-----------------------------------------------------------------------------------------------------------|-----------------------------------------------------------|------------------------------------------------------------------------------------|------------------------------------------------------------------|--|
| Possible                                                                                                  | Low clinical suspicion, one or more of the following      | Uncertainty about infiltrates on CXR                                               |                                                                  |  |
|                                                                                                           |                                                           | Cough                                                                              |                                                                  |  |
|                                                                                                           |                                                           | Purulent sputum                                                                    |                                                                  |  |
|                                                                                                           |                                                           | Fever or hypothermia                                                               |                                                                  |  |
|                                                                                                           |                                                           | Leucocytosis                                                                       |                                                                  |  |
|                                                                                                           |                                                           | Increased CRP (>30mg/L)                                                            |                                                                  |  |
| Probable                                                                                                  | High clinical suspicion, one or more of the following     | Evident infiltrates on CXR                                                         |                                                                  |  |
|                                                                                                           |                                                           | Crepitations during auscultation                                                   |                                                                  |  |
|                                                                                                           |                                                           | Positive pneumococcal or legionella urine test                                     |                                                                  |  |
| Definite                                                                                                  | Causative organism detected, one or more of the following | Evident infiltrates on CXR                                                         |                                                                  |  |
|                                                                                                           |                                                           | High clinical suspicion                                                            |                                                                  |  |
|                                                                                                           |                                                           | Positive blood culture                                                             |                                                                  |  |
|                                                                                                           |                                                           | High growth in tracheal aspirate                                                   |                                                                  |  |
|                                                                                                           |                                                           | Isolation of virus                                                                 |                                                                  |  |
|                                                                                                           |                                                           | Positive serology                                                                  |                                                                  |  |
| Histopathology                                                                                            |                                                           |                                                                                    |                                                                  |  |
| <b>Hospital acquired pneumonia</b>                                                                        |                                                           | <i>Symptoms of pneumonia started after 48h of hospital admission</i>               |                                                                  |  |
| Possible                                                                                                  | Low clinical suspicion, one or more of the following      | Uncertainty about infiltrates on CXR                                               |                                                                  |  |
|                                                                                                           |                                                           | Cough                                                                              |                                                                  |  |
|                                                                                                           |                                                           | Purulent sputum                                                                    |                                                                  |  |
|                                                                                                           |                                                           | Fever or hypothermia                                                               |                                                                  |  |
|                                                                                                           |                                                           | Leucocytosis                                                                       |                                                                  |  |
|                                                                                                           |                                                           | Increased CRP (>30mg/L)                                                            |                                                                  |  |
| Probable                                                                                                  | High clinical suspicion, one or more of the following     | Evident infiltrates on CXR                                                         |                                                                  |  |
|                                                                                                           |                                                           | Crepitations during auscultation                                                   |                                                                  |  |
|                                                                                                           |                                                           | PaO2/FiO2 ratio < 300                                                              |                                                                  |  |
|                                                                                                           |                                                           | Mechanical ventilation                                                             |                                                                  |  |
|                                                                                                           |                                                           | Causative organism detected, one or more of the following                          | Detection of pathogen in respiratory secretion                   |  |
|                                                                                                           |                                                           |                                                                                    | Quantitative culture of BAL/PSB but below threshold for definite |  |
| Definite                                                                                                  | Causative organism detected, one or more of the following | Evident infiltrates on CXR                                                         |                                                                  |  |
|                                                                                                           |                                                           | High clinical suspicion with one or more of the following                          |                                                                  |  |
|                                                                                                           |                                                           | Crepitations during auscultation                                                   |                                                                  |  |
|                                                                                                           |                                                           | PaO2/FiO2 ratio < 300                                                              |                                                                  |  |
|                                                                                                           |                                                           | Mechanical ventilation                                                             |                                                                  |  |
|                                                                                                           |                                                           | Positive blood culture with respiratory pathogen                                   |                                                                  |  |
| Quantitative culture of BAL/PSB but above threshold (10 <sup>3</sup> for PSB and 10 <sup>4</sup> for BAL) |                                                           |                                                                                    |                                                                  |  |
| Isolation of virus                                                                                        |                                                           |                                                                                    |                                                                  |  |
| Positive serology                                                                                         |                                                           |                                                                                    |                                                                  |  |
| Histopathology                                                                                            |                                                           |                                                                                    |                                                                  |  |

**Table E3: Logistic regression model**

| VOC             | Fragment | Regression coefficient |
|-----------------|----------|------------------------|
| Octane          | m/z 84   | -2.03                  |
| Octane          | m/z 85   | 7.02                   |
| Octane          | m/z 114  | 3.65                   |
| Acetaldehyde    | m/z 44   | 0.49                   |
| 3-Methylheptane | m/z 84   | 0.67                   |

**Table E4: Patient characteristics in training cohort.**

|                                    |                      | Control (25)   | ARDS (23)       | P-value |
|------------------------------------|----------------------|----------------|-----------------|---------|
| Age                                | (years)              | 60 (51–74)     | 66 (43–75)      | 0.79    |
| Male                               | (yes)                | 14 (56)        | 15 (65)         | 0.91    |
| APACHE II                          |                      | 24 (17–26)     | 24 (20–29)      | 0.23    |
| SAPS II                            |                      | 48 (39–58)     | 46 (39–63)      | 0.65    |
| Admission type                     | Medical              | 14 (56)        | 16 (70)         | 0.72    |
|                                    | Elective surgery     | 4 (16)         | 6 (26)          |         |
|                                    | Emergency surgery    | 2 (8)          | 1 (4)           |         |
| Comorbidities                      | Asthma               | 0 (0)          | 0 (0)           | -       |
|                                    | COPD                 | 3 (12)         | 2 (9)           | 0.60    |
|                                    | Other respiratory    | 0 (0)          | 2 (9)           | 0.16    |
|                                    | Malignancy           | 2 (8)          | 3 (13)          | 0.67    |
|                                    | DM                   | 1 (4)          | 7 (30)          | 0.02    |
| Pmax                               | (cmH <sub>2</sub> O) | 17 (14–18)     | 27 (23–31)      | <0.001  |
| PEEP                               | (cmH <sub>2</sub> O) | 5 (5–5)        | 10 (7–11)       | <0.001  |
| Tidal volume                       | (ml)                 | 464 (373–518)  | 447 (383–500)   | 0.85    |
| Minute volume                      | (l/min)              | 8.7 (7.1–10.4) | 12.5 (9.8–14.2) | <0.001  |
| PaCO <sub>2</sub>                  | (kPa)                | 5.1 (4.6–5.7)  | 5.5 (4.6–6.1)   | 0.37    |
| PaO <sub>2</sub> /FiO <sub>2</sub> | (mmHg/%)             | 341 (272–438)  | 219 (147–286)   | <0.001  |
| LIPS                               |                      | 3 (2–4)        | 5 (5–5)         | <0.001  |
| ICU Mortality                      |                      | 2 (8)          | 8 (35)          | 0.06    |

Differences between groups are tested using Mann-Whitney U or Chi-square test (with Yates' correction if necessary) and P-values are reported.

**Table E5: Patient characteristics in temporal validation cohort.**

|                                    |                      | Control (27)  | ARDS (19)      | P-value |
|------------------------------------|----------------------|---------------|----------------|---------|
| Age                                | (years)              | 60 (37–67)    | 68 (51–72)     | 0.19    |
| Male                               | (yes)                | 16 (59)       | 16 (84)        | 0.27    |
| APACHE II                          |                      | 17 (13–23)    | 22 (17–24)     | 0.14    |
| SAPS II                            |                      | 41 (32–49)    | 46 (40–56)     | 0.12    |
| Admission type                     | Medical              | 20 (74)       | 12 (63)        | 0.53    |
|                                    | Elective surgery     | 2 (7)         | 6 (32)         |         |
|                                    | Emergency surgery    | 1 (4)         | 1 (5)          |         |
| Comorbidities                      | Asthma               | 0 (0)         | 1 (5)          | 0.26    |
|                                    | COPD                 | 1 (4)         | 0 (0)          | 0.36    |
|                                    | Other respiratory    | 0 (0)         | 0 (0)          | -       |
|                                    | Malignancy           | 1 (4)         | 4 (21)         | 0.10    |
|                                    | DM                   | 5 (19)        | 2 (11)         | 0.33    |
| Pmax                               | (cmH <sub>2</sub> O) | 15 (14–20)    | 20 (17–24)     | 0.05    |
| PEEP                               | (cmH <sub>2</sub> O) | 5 (5–5)       | 8 (5–10)       | 0.002   |
| Tidal volume                       | (ml)                 | 451 (429–517) | 549 (479–620)  | 0.06    |
| Minute volume                      | (l/min)              | 9.7 (7.9–11)  | 9.4 (7.6–10.8) | 0.93    |
| PaCO <sub>2</sub>                  | (kPa)                | 4.9 (4.4–5.4) | 5.3 (4.8–5.9)  | 0.04    |
| PaO <sub>2</sub> /FiO <sub>2</sub> | (mmHg/%)             | 375 (307–480) | 241 (204–290)  | <0.001  |
| LIPS                               |                      | 2 (1–3)       | 4 (4–5)        | <0.001  |
| ICU Mortality                      |                      | 3 (11)        | 4 (21)         | 0.39    |

Differences between groups are tested using Mann-Whitney U or Chi-square test (with Yates' correction if necessary) and P-values are reported.

## Supplement Figures

Figure E1: Patient classification

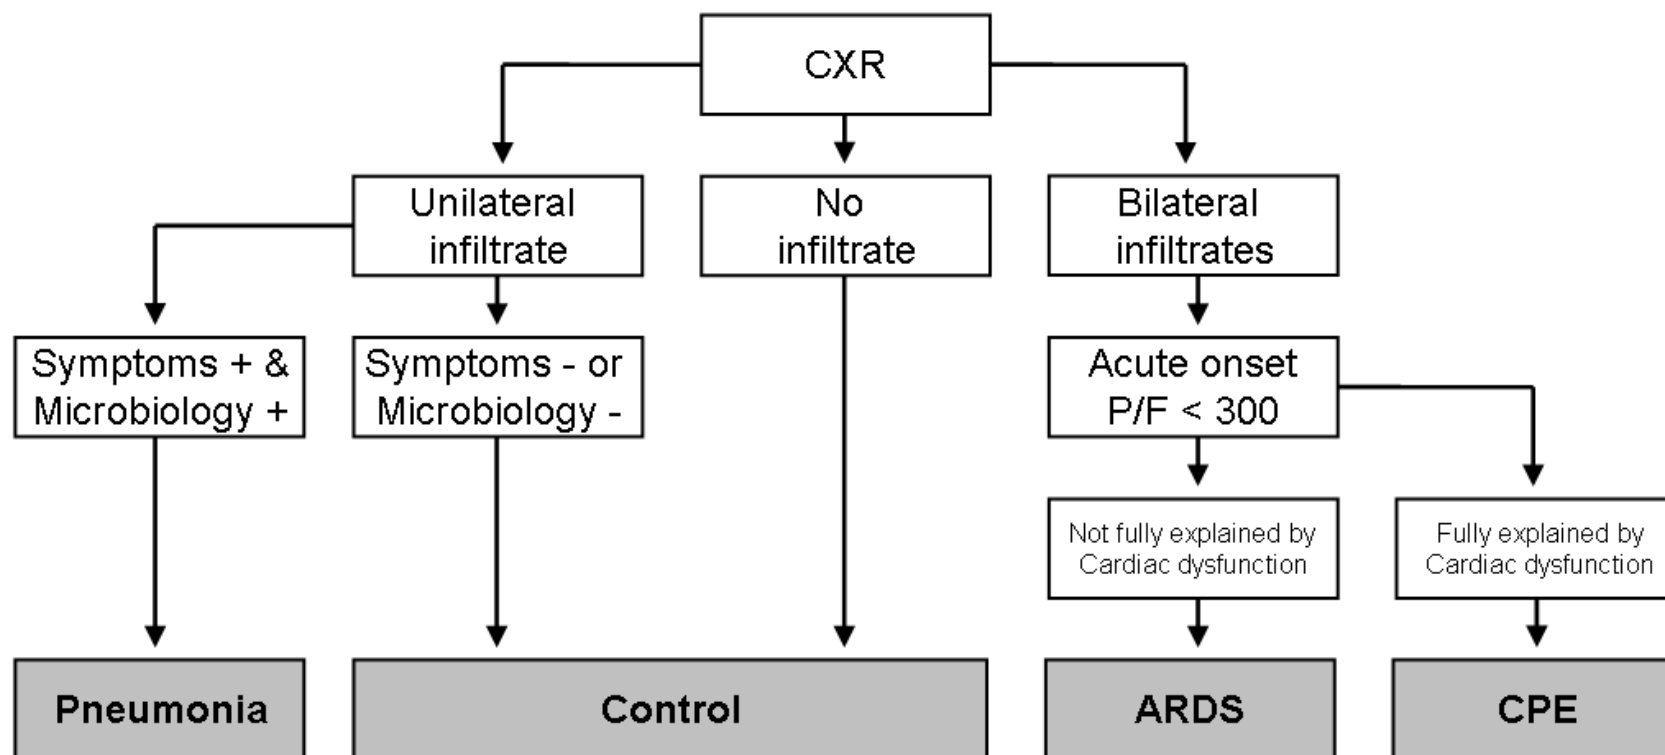

**Figure E2: Relative abundances of selected fragments between ARDS patients and controls in the *training* cohort.**

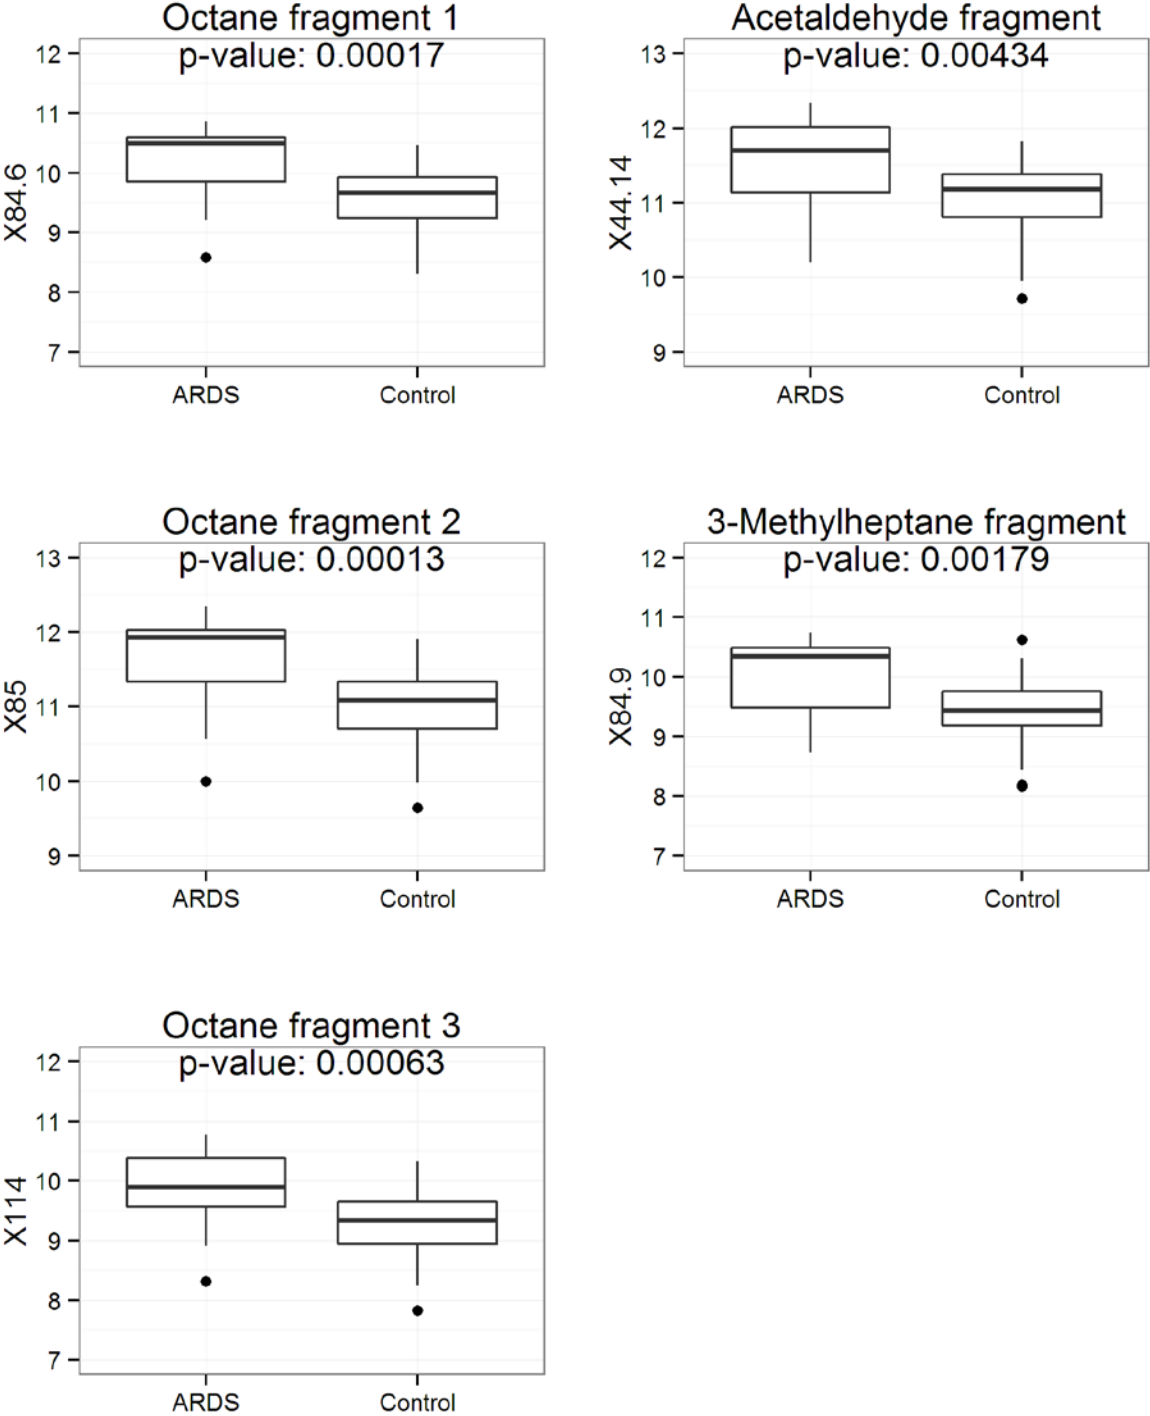

**Figure E3: Typical chromatogram with selected volatile organic compounds.**

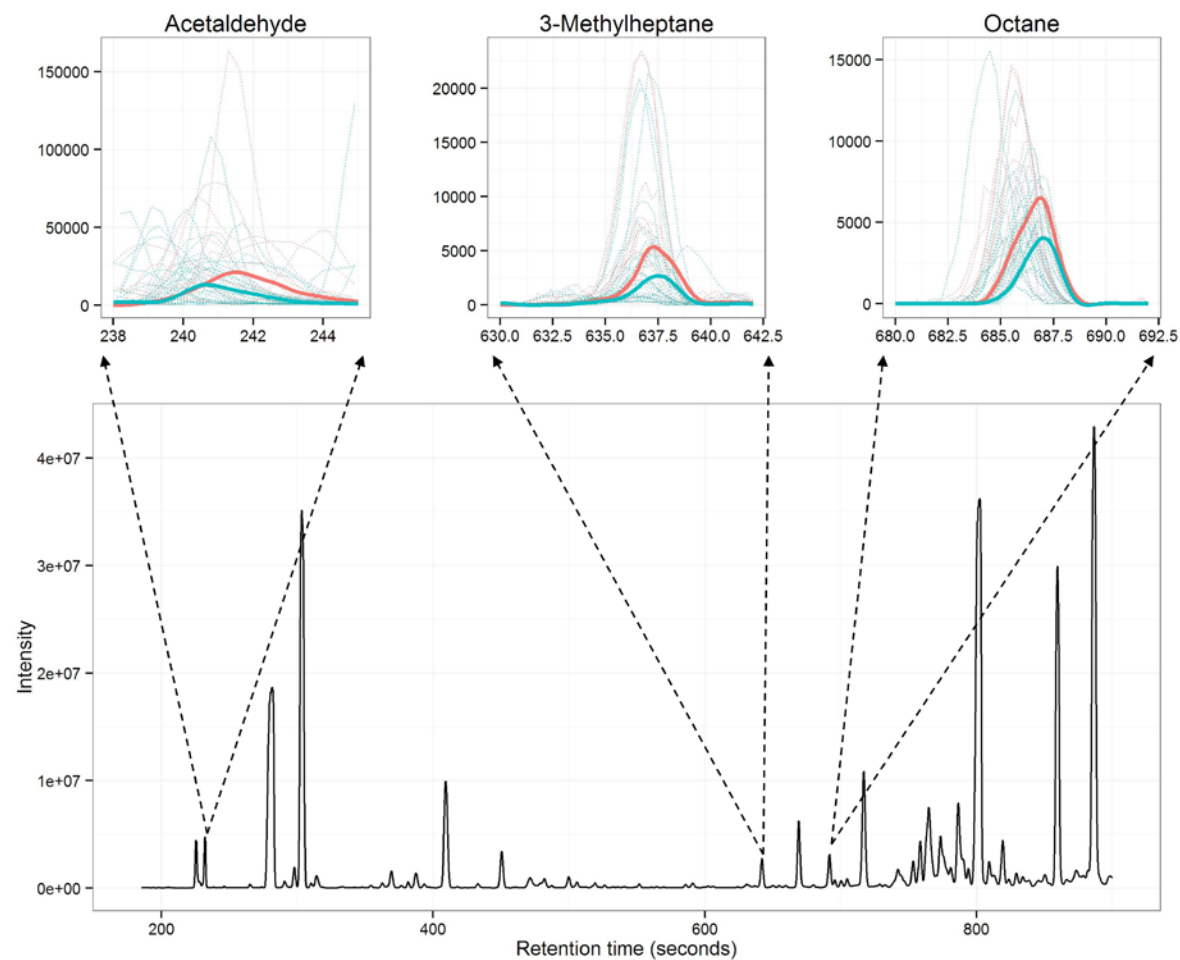

The bottom panel shows a typical chromatogram from one patient. Every peak represents a volatile metabolite and the area under the peak is linearly associated with the relative concentration. The top panel shows the individual chromatograms of the three VOCs that were used for ARDS classification. The solid red line shows the median ARDS chromatogram and the solid blue line shows the median control chromatogram.

**Figure E4: Relative abundances of selected fragments between ARDS patients and controls in the temporal external validation cohort.**

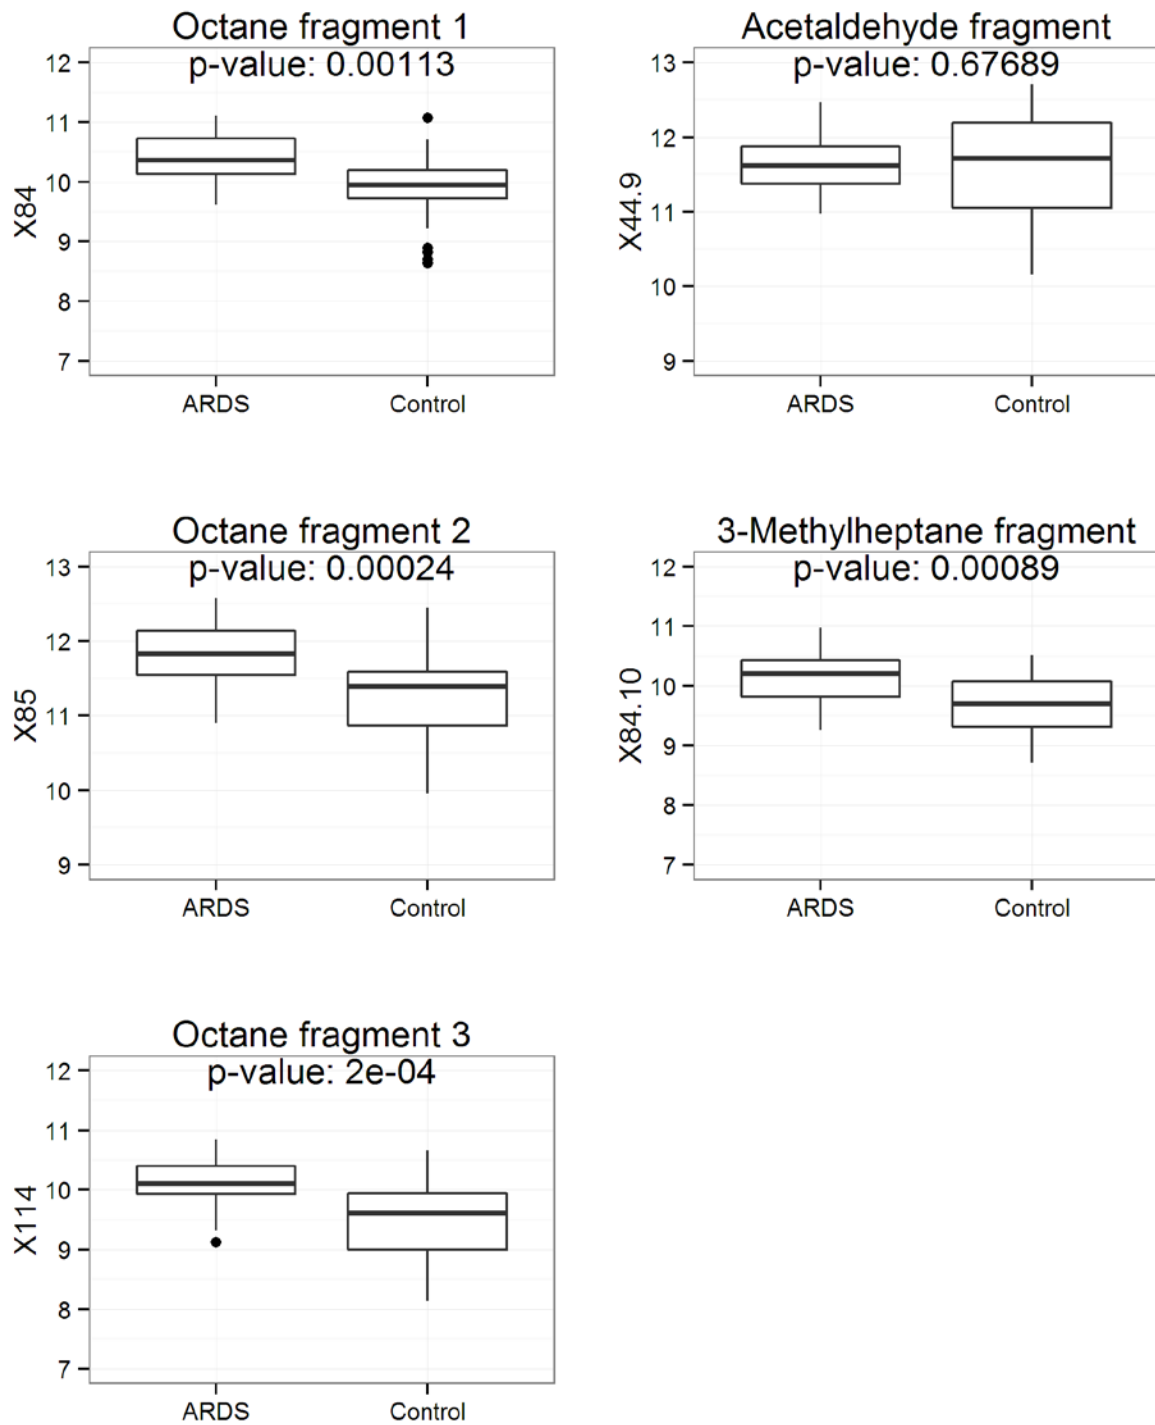



Figure E5: Calibration of the classification algorithm in the training and temporal validation cohort.

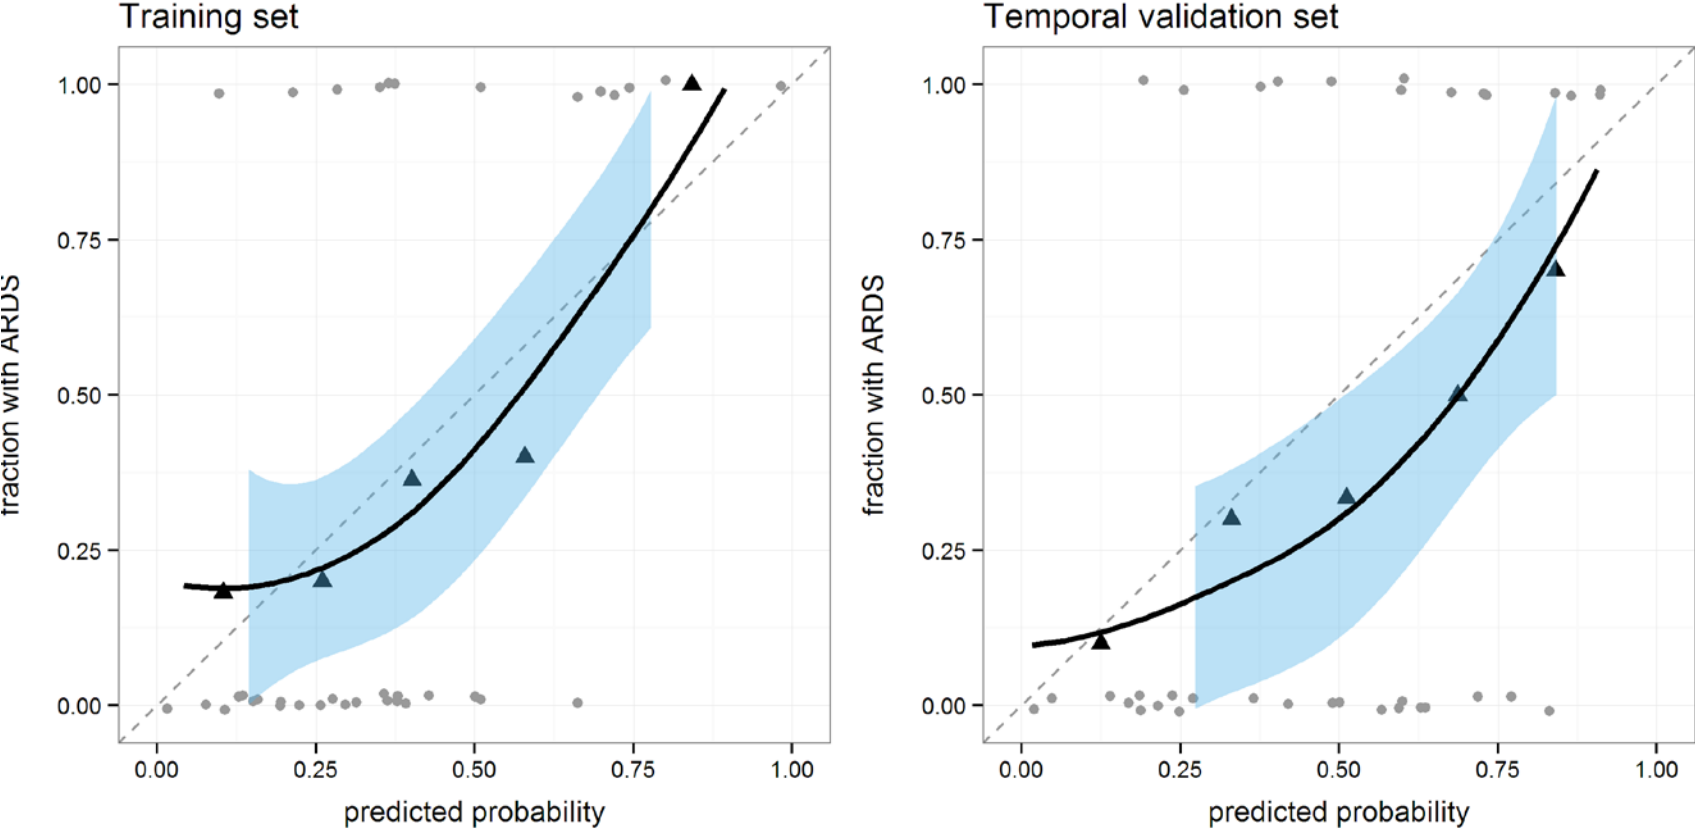

**Figure E6: Result of exhaled breath analysis per subgroup**

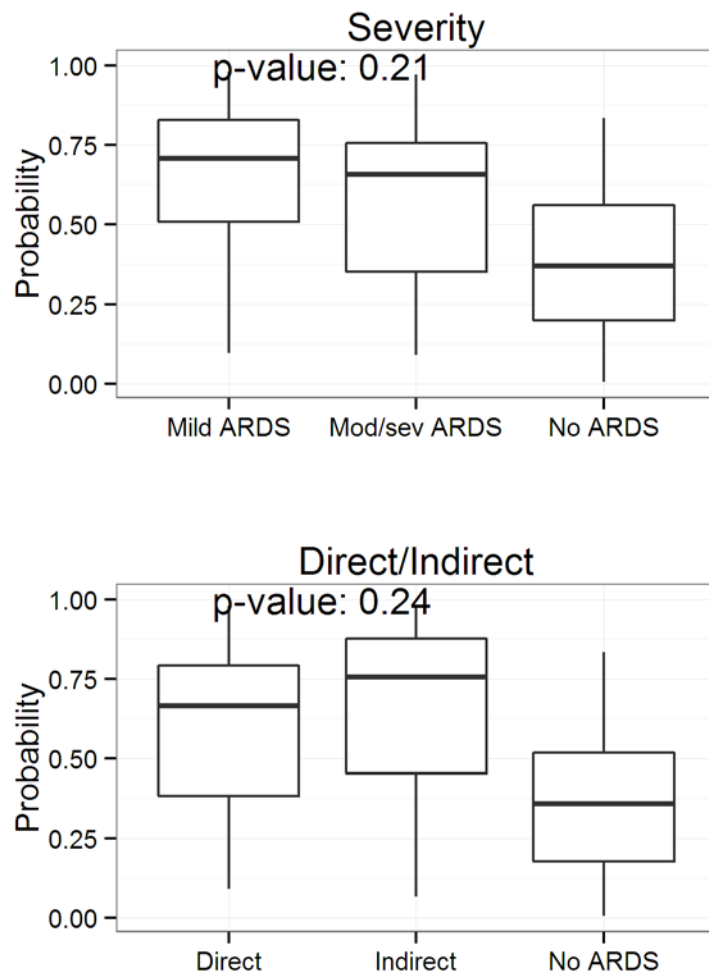

**Figure E7: Relative abundance of isoprene in patients with and without ARDS.**

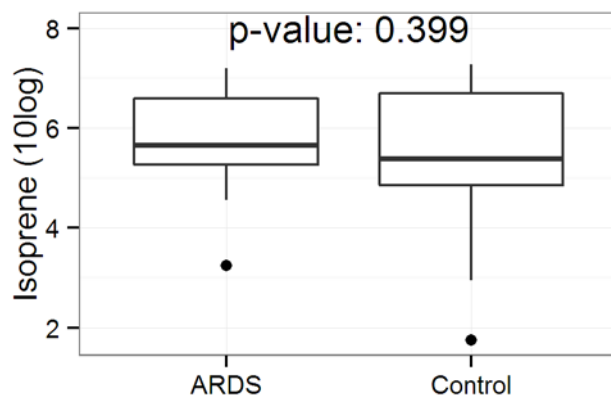

Supplement: Bos_ERJ_GCMSforARDS_SupplementaryMaterial_R1_1.pdf [file Bos_ERJ_GCMSforARDS_SupplementaryMaterial_R1_1.pdf]
